# Supplementary material for: Transcriptional Repressive H3K9 and H3K27 Methylations Contribute to DNMT1-Mediated DNA Methylation Recovery
Source: PubMed Central journal article supplement (PMC3035659; doi:10.1371/journal.pone.0016702), 2011-02-08
Supplement: pone.0016702.s001.pdf [file pone.0016702.s001.pdf]

# DLC1

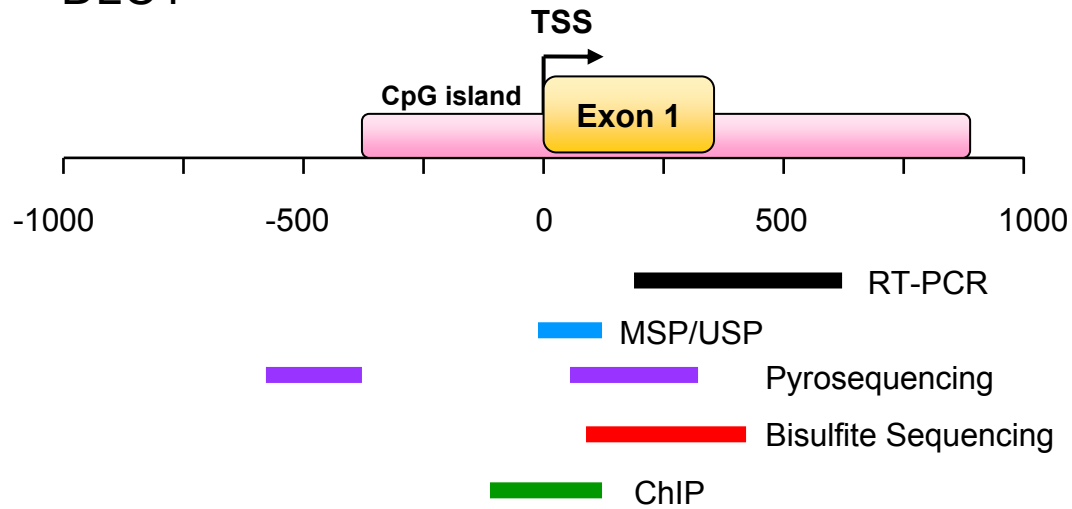

CpG Island: -387 to +765

Exon 1: +1 to +332

RT-PCR: +192 to +649

MSP: -31 to +147

USP: -28 to +144

Pyrosequencing: -579 to -386; +20 to +311

Bisulfite sequencing: +45 to +336

ChIP: -113 to +117
