# Supplementary material for: Transcriptional Repressive H3K9 and H3K27 Methylations Contribute to DNMT1-Mediated DNA Methylation Recovery
Source: PubMed Central journal article supplement (PMC3035659; doi:10.1371/journal.pone.0016702), 2011-02-08

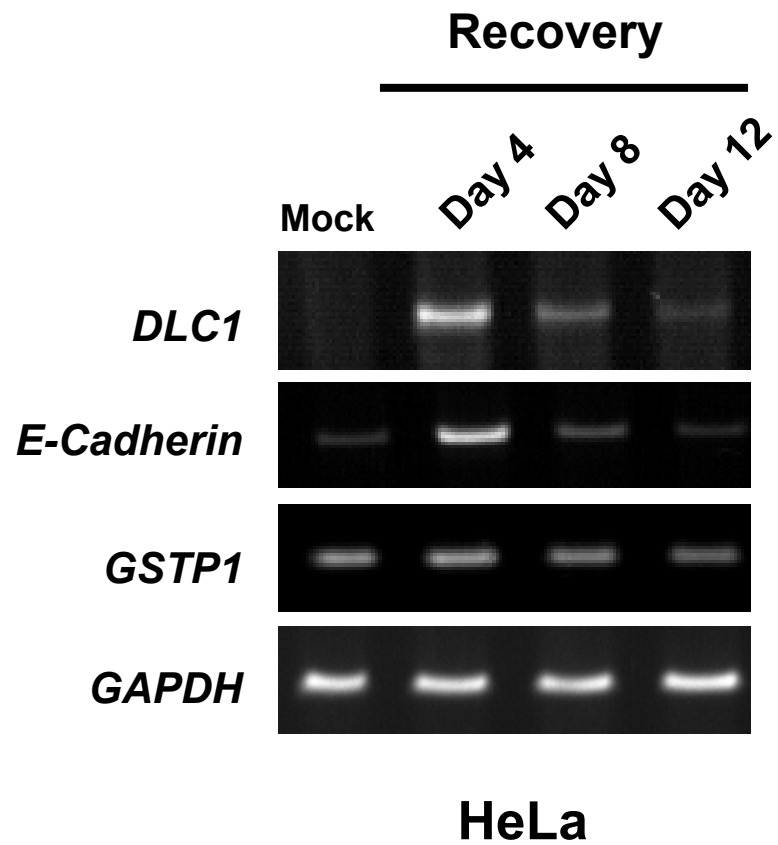

Supplement: pone.0016702.s003.pdf [file pone.0016702.s003.pdf]
