# Supplementary material for: Transcriptional Repressive H3K9 and H3K27 Methylations Contribute to DNMT1-Mediated DNA Methylation Recovery
Source: PubMed Central journal article supplement (PMC3035659; doi:10.1371/journal.pone.0016702), 2011-02-08
Supplement: pone.0016702.s005.pdf [file pone.0016702.s005.pdf]

**RT-PCR**

DLC1  
E-Cadherin  
GSTP1  
p16INK4a  
uPA  
KRT19  
GAPDH

**Forward primer**

AGCAAGGATGCGTTGAGG  
CGACCCAACCCAAGAATCTA  
ACCTCCGCTGCAAATACATC  
CAGGTGGGTAGAAGGTCTGC  
CTGCTATGAGGGGAATGGTC  
TTTGTGCCTCGTCCTCCTC  
ACGCATTTGGTCGTATTGGG

**Reverse priemr**

CACCTCTTGCTGTCCCTTG  
GCTGGCTCAAGTCAAAGTCC  
GGCTAGGACCTCATGGATCA  
GGCTCCTCATTCCTCTCCT  
GGTTCTCGATGGTGGTGAAT  
AGAGCCTGTTCCGTCTCAA  
TGATTTTGGAGGGATCTCGC

**Real-time PCR**

DLC1  
HPRT

**TaqMan Gene Expression Assays ID**

Hs00931487\_m1  
Hs99999909\_m1

**MSP**

DLC1 MSP  
DLC1 USP

**Forward primer**

TTTAAAGATCGAAACGAGGGAGCG  
TTTTTTAAAGATTGAAATGAGGGAGTG

**Reverse priemr**

CCCAACGAAAAAATCCGACTAACG  
AAACCAACAAAAAATCCCAACTAACA

**Bisulfite DNA sequencing**

DLC1

**Forward primer**

GTTTTTAGTTAGGATATGGT

**Reverse priemr**

ACTTCT TTCTACACATCAAACAC

**Pyrosequence**

DLC1 (5'-UTR)  
DLC1 (1st Exon)

**Forward primer**

AGTGAAAGTTTAATTTTTTAAGGTAG  
GTTTTTAGTTAGGATATGGT

**Reverse priemr**

5'-Biotin-CAAAAATCACAAAACATTTACTT  
5'-Biotin-ACTTCTTTCTACACATCAAACAC

**Extension primer**

GTTTTTATAGATTTGGAAATATTGATT  
GTTTTTAGTTAGGATATGGT

**ChIP**

DLC1

**Forward primer**

AGAACAGCCCGTCGCTAAG

**Reverse priemr**

AGGGAGTTGGGCGAGAAGT
